# Supplementary material for: Macrophage-Immunomodulatory Actions of Bovine Whey Protein Isolate, Glycomacropeptide, and Their In Vitro and In Vivo Digests
Source: MDPI journal article supplement (doi:10.3390/nu15234942), 2023-11-28
Supplement: s1 [file s1]

### Supplementary Results

**Table S1.** Cell viability was assessed by the MTT assay. The results were expressed as % of control (media only) and represent the means of three independent experiments.

| Treatment                | Cell Viability (% of Control) <sup>a</sup> |
|--------------------------|--------------------------------------------|
| Inducer only (LPS)       | 96.0 ± 4.8                                 |
| WPI <sup>b</sup> 1000    | 91.9 ± 4.8                                 |
| WPI 100                  | 95.0 ± 5.4                                 |
| WPI 10                   | 98.1 ± 4.1                                 |
| WPID <sup>c</sup> 1000   | 97.2 ± 3.6                                 |
| WPID 100                 | 97.2 ± 2.8                                 |
| WPID 10                  | 92.6 ± 4.1                                 |
| GMP <sup>d</sup> 1000    | 94.1 ± 9.6                                 |
| GMP 100                  | 96.6 ± 2.3                                 |
| GMP 10                   | 96.0 ± 5.6                                 |
| GMPD <sup>e</sup> 1000   | 92.9 ± 7.3                                 |
| GMPD 100                 | 93.6 ± 3.2                                 |
| GMPD 10                  | 90.0 ± 3.3                                 |
| WPIINT <sup>f</sup> 1000 | 94.7 ± 3.5                                 |
| WPIINT100                | 94.1 ± 4.9                                 |
| WPIINT10                 | 100.5 ± 5.8                                |

<sup>a</sup> One-sided t-tests were conducted to test if there are significant differences between each treatment from the LPS-only control ( $P < 0.05$ ). No significant different was found between each treatment and LPS-only control.  $n = 6$  technical replicates (3 days of cell experiment replication, duplicate wells on each day).

<sup>b</sup> Whey protein isolate (WPI)

<sup>c</sup> In vitro-digested whey protein isolate (WPID)

<sup>d</sup> Glycomacropeptide (GMP)

<sup>e</sup> In vitro-digested glycomacropeptide (GMPD)

<sup>f</sup> Intestinal-digested whey protein isolate (WPIINT)

**Table S2.** Concentrations of cytokines in cells based on treatment.

| Treatment              | TNF- $\alpha$ (pg/mL) <sup>a</sup> | IL-1 $\beta$ (pg/mL) |
|------------------------|------------------------------------|----------------------|
| Blank cell             | 33.6±11.9                          | 67.4±10.7            |
| Inducer only (LPS)     | 216.3 ± 19.3                       | 313.3±47.7           |
| WPI <sup>b</sup> 1000  | 233.9±18.1                         | 132.2±16.2           |
| WPI 100                | 234.5±22.5                         | 146.0±17.4           |
| WPI 10                 | 218.4±11.8                         | 178.8±26.3           |
| WPID <sup>c</sup> 1000 | 115.5±17.3                         | 152.6±14.6           |
| WPID 100               | 149.4±20.9                         | 157.5±22.8           |
| WPID 10                | 178.1±22.2                         | 171.9±22.5           |
| GMP <sup>d</sup> 1000  | 276.3±39.2                         | 492.2±83.8           |
| GMP 100                | 262.6±19.2                         | 430.2±63.1           |

|                          |            |            |
|--------------------------|------------|------------|
| GMP 10                   | 89.5±21.6  | 310.8±46.1 |
| GMPDe 1000               | 109.0±11.3 | 151.2±14.6 |
| GMPD 100                 | 157.1±14.4 | 114.7±17.7 |
| GMPD 10                  | 58.6±26.9  | 212.5±30.2 |
| WPIINT <sup>f</sup> 1000 | 58.6±26.9  | 421.7±57.6 |
| WPIINT 100               | 60.6±28.3  | 327.0±50.5 |
| WPIINT 10                | 63.5±2.9   | 160.8±14.9 |

<sup>a</sup> n = 6 technical replicates (3 days of cell experiment replication, duplicate wells on each day).

<sup>b</sup> Whey protein isolate (WPI)

<sup>c</sup> In vitro-digested whey protein isolate (WPID)

<sup>d</sup> Glycomacropeptide (GMP)

<sup>e</sup> In vitro-digested glycomacropeptide (GMPD)

<sup>f</sup> Intestinal-digested whey protein isolate (WPIINT)

Table S3. Two-sided t-tests were performed to determine whether each cytokine concentration (TNF- $\alpha$  and IL-1 $\beta$ ) in each treatment (WPI, GMP, WPID, GMPD, WPIINT at each dose (10, 100 and 1,000  $\mu$ g/mL)) were significantly different from the LPS-only control using GraphPad Prism software (version 8.2).

|                        | P value t-test compared to control |              |
|------------------------|------------------------------------|--------------|
|                        | TNF- $\alpha$ <sup>a</sup>         | IL-1 $\beta$ |
| WPI 1000 <sup>b</sup>  | 0.1332                             | <0.0001      |
| WPI 100                | 0.1639                             | <0.0001      |
| WPI 10                 | 0.8233                             | 0.0001       |
| WPID 1000 <sup>c</sup> | <0.0001                            | <0.0001      |
| WPID 100               | 0.0002                             | <0.0001      |
| WPID 10                | 0.0098                             | <0.0001      |
| GMP 1000 <sup>d</sup>  | 0.0071                             | 0.0011       |
| GMP 100                | 0.0335                             | 0.0047       |
| GMP 10                 | 0.8162                             | 0.9293       |

|                          |         |         |
|--------------------------|---------|---------|
| GMPD 1000 <sup>c</sup>   | <0.0001 | <0.0001 |
| GMPD 100                 | <0.0001 | <0.0001 |
| GMPD 10                  | 0.0001  | 0.0014  |
| WPIINT 1000 <sup>f</sup> | <0.0001 | 0.0053  |
| WPIINT 100               | <0.0001 | 0.6412  |
| WPIINT 10                | <0.0001 | <0.0001 |

<sup>a</sup> n = 6 technical replicates (3 days of cell experiment replication, duplicate wells on each day).

<sup>b</sup> Whey protein isolate (WPI)

<sup>c</sup> In vitro-digested whey protein isolate (WPID)

<sup>d</sup> Glycomacropeptide (GMP)

<sup>e</sup> In vitro-digested glycomacropeptide (GMPD)

<sup>f</sup> Intestinal-digested whey protein isolate (WPIINT)

| Digested   | Concentration | -Digested  | -Concentration | Difference | Std Error | t Ratio | Prob> t | Lower 95% | Upper 95% |
|------------|---------------|------------|----------------|------------|-----------|---------|---------|-----------|-----------|
| No         | 10            | No         | 100            | -0.090000  | 0.0636479 | -1.41   | 0.8861  | -0.298034 | 0.118034  |
| No         | 10            | No         | 1000           | -0.091667  | 0.0636479 | -1.44   | 0.8755  | -0.299701 | 0.116367  |
| No         | 10            | Simulated  | 10             | 0.226667   | 0.0636479 | 3.56    | 0.0236* | 0.018633  | 0.434701  |
| No         | 10            | Simulated  | 100            | 0.381667   | 0.0636479 | 6.00    | <.0001* | 0.173633  | 0.589701  |
| No         | 10            | Simulated  | 1000           | 0.571667   | 0.0636479 | 8.98    | <.0001* | 0.363633  | 0.779701  |
| No         | 10            | Intestinal | 10             | 0.853333   | 0.0636479 | 13.41   | <.0001* | 0.645299  | 1.061367  |
| No         | 10            | Intestinal | 100            | 0.875000   | 0.0636479 | 13.75   | <.0001* | 0.666966  | 1.083034  |
| No         | 10            | Intestinal | 1000           | 0.885000   | 0.0636479 | 13.90   | <.0001* | 0.676966  | 1.093034  |
| No         | 100           | No         | 1000           | -0.001667  | 0.0636479 | -0.03   | 1.0000  | -0.209701 | 0.206367  |
| No         | 100           | Simulated  | 10             | 0.316667   | 0.0636479 | 4.98    | 0.0004* | 0.108633  | 0.524701  |
| No         | 100           | Simulated  | 100            | 0.471667   | 0.0636479 | 7.41    | <.0001* | 0.263633  | 0.679701  |
| No         | 100           | Simulated  | 1000           | 0.661667   | 0.0636479 | 10.40   | <.0001* | 0.453633  | 0.869701  |
| No         | 100           | Intestinal | 10             | 0.943333   | 0.0636479 | 14.82   | <.0001* | 0.735299  | 1.151367  |
| No         | 100           | Intestinal | 100            | 0.965000   | 0.0636479 | 15.16   | <.0001* | 0.756966  | 1.173034  |
| No         | 100           | Intestinal | 1000           | 0.975000   | 0.0636479 | 15.32   | <.0001* | 0.766966  | 1.183034  |
| No         | 1000          | Simulated  | 10             | 0.318333   | 0.0636479 | 5.00    | 0.0003* | 0.110299  | 0.526367  |
| No         | 1000          | Simulated  | 100            | 0.473333   | 0.0636479 | 7.44    | <.0001* | 0.265299  | 0.681367  |
| No         | 1000          | Simulated  | 1000           | 0.663333   | 0.0636479 | 10.42   | <.0001* | 0.455299  | 0.871367  |
| No         | 1000          | Intestinal | 10             | 0.945000   | 0.0636479 | 14.85   | <.0001* | 0.736966  | 1.153034  |
| No         | 1000          | Intestinal | 100            | 0.966667   | 0.0636479 | 15.19   | <.0001* | 0.758633  | 1.174701  |
| No         | 1000          | Intestinal | 1000           | 0.976667   | 0.0636479 | 15.34   | <.0001* | 0.768633  | 1.184701  |
| Simulated  | 10            | Simulated  | 100            | 0.155000   | 0.0636479 | 2.44    | 0.2925  | -0.053034 | 0.363034  |
| Simulated  | 10            | Simulated  | 1000           | 0.345000   | 0.0636479 | 5.42    | <.0001* | 0.136966  | 0.553034  |
| Simulated  | 10            | Intestinal | 10             | 0.626667   | 0.0636479 | 9.85    | <.0001* | 0.418633  | 0.834701  |
| Simulated  | 10            | Intestinal | 100            | 0.648333   | 0.0636479 | 10.19   | <.0001* | 0.440299  | 0.856367  |
| Simulated  | 10            | Intestinal | 1000           | 0.658333   | 0.0636479 | 10.34   | <.0001* | 0.450299  | 0.866367  |
| Simulated  | 100           | Simulated  | 1000           | 0.190000   | 0.0636479 | 2.99    | 0.0976  | -0.018034 | 0.398034  |
| Simulated  | 100           | Intestinal | 10             | 0.471667   | 0.0636479 | 7.41    | <.0001* | 0.263633  | 0.679701  |
| Simulated  | 100           | Intestinal | 100            | 0.493333   | 0.0636479 | 7.75    | <.0001* | 0.285299  | 0.701367  |
| Simulated  | 100           | Intestinal | 1000           | 0.503333   | 0.0636479 | 7.91    | <.0001* | 0.295299  | 0.711367  |
| Simulated  | 1000          | Intestinal | 10             | 0.281667   | 0.0636479 | 4.43    | 0.0020* | 0.073633  | 0.489701  |
| Simulated  | 1000          | Intestinal | 100            | 0.303333   | 0.0636479 | 4.77    | 0.0007* | 0.095299  | 0.511367  |
| Simulated  | 1000          | Intestinal | 1000           | 0.313333   | 0.0636479 | 4.92    | 0.0004* | 0.105299  | 0.521367  |
| Intestinal | 10            | Intestinal | 100            | 0.021667   | 0.0636479 | 0.34    | 1.0000  | -0.186367 | 0.229701  |
| Intestinal | 10            | Intestinal | 1000           | 0.031667   | 0.0636479 | 0.50    | 0.9999  | -0.176367 | 0.239701  |
| Intestinal | 100           | Intestinal | 1000           | 0.010000   | 0.0636479 | 0.16    | 1.0000  | -0.198034 | 0.218034  |

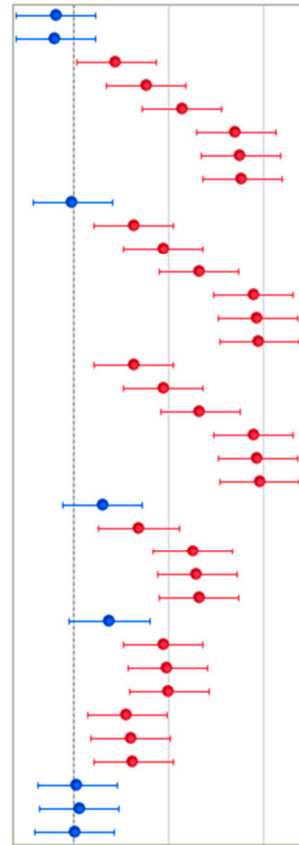

Figure S1. The significance of the differences in percent change of TNF- $\alpha$  from the LPS-only control among WPI, WPID and WPIINT at each concentration were assessed using multi-factor ANOVA followed by Tukey's HSD tests, using JMP software (version 17). n = 6 technical replicates (3 days of cell experiment replication, duplicate wells on each day).

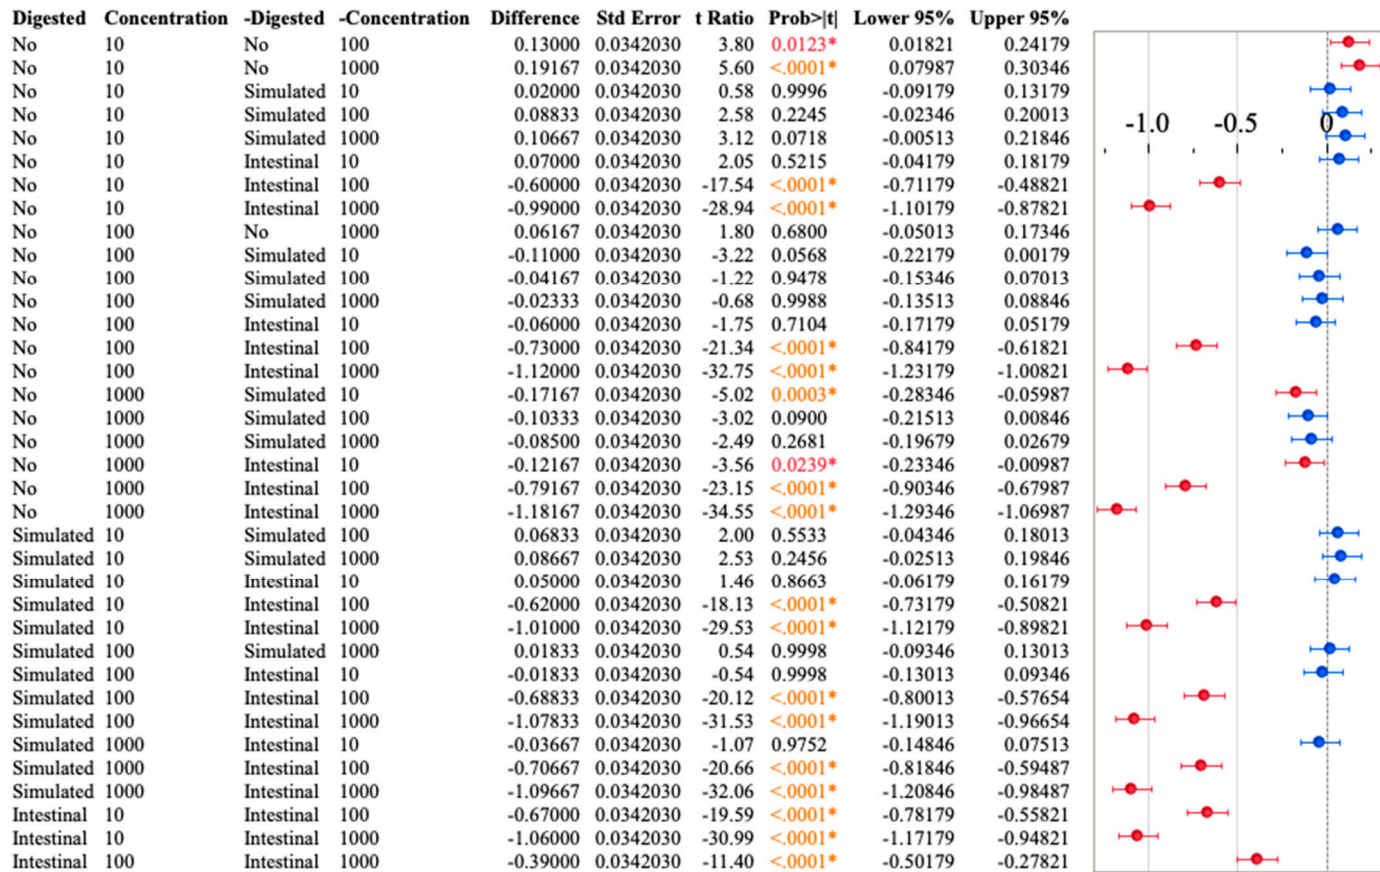

Figure S2. The significance of the differences in percent change of IL-1 $\beta$  from the LPS-only control among WPI, WPID and WPIINT at each concentration were assessed using multi-factor ANOVA followed by Tukey's HSD tests, using JMP software (version 17). n = 6 technical replicates (3 days of cell experiment replication, duplicate wells on each day).

| Digested  | Concentration | -Digested | -Concentration | Difference | Std Error | t Ratio | Prob> t | Lower 95% | Upper 95% |
|-----------|---------------|-----------|----------------|------------|-----------|---------|---------|-----------|-----------|
| No        | 10            | No        | 100            | -0.27167   | 0.0655120 | -4.15   | 0.0037* | -0.472386 | -0.07095  |
| No        | 10            | No        | 1000           | -0.35167   | 0.0655120 | -5.37   | 0.0002* | -0.552386 | -0.15095  |
| No        | 10            | Simulated | 10             | 0.31000    | 0.0655120 | 4.73    | 0.0008* | 0.109281  | 0.51072   |
| No        | 10            | Simulated | 100            | 0.57500    | 0.0655120 | 8.78    | <.0001* | 0.374281  | 0.77572   |
| No        | 10            | Simulated | 1000           | 0.68667    | 0.0655120 | 10.48   | <.0001* | 0.485948  | 0.88739   |
| No        | 100           | No        | 1000           | -0.08000   | 0.0655120 | -1.22   | 0.8228  | -0.280719 | 0.12072   |
| No        | 100           | Simulated | 10             | 0.58167    | 0.0655120 | 8.88    | <.0001* | 0.380948  | 0.78239   |
| No        | 100           | Simulated | 100            | 0.84667    | 0.0655120 | 12.92   | <.0001* | 0.645948  | 1.04739   |
| No        | 100           | Simulated | 1000           | 0.95833    | 0.0655120 | 14.63   | <.0001* | 0.757614  | 1.15905   |
| No        | 1000          | Simulated | 10             | 0.66167    | 0.0655120 | 10.10   | <.0001* | 0.460948  | 0.86239   |
| No        | 1000          | Simulated | 100            | 0.92667    | 0.0655120 | 14.14   | <.0001* | 0.725948  | 1.12739   |
| No        | 1000          | Simulated | 1000           | 1.03833    | 0.0655120 | 15.85   | <.0001* | 0.837614  | 1.23905   |
| Simulated | 10            | Simulated | 100            | 0.26500    | 0.0655120 | 4.05    | 0.0047* | 0.064281  | 0.46572   |
| Simulated | 10            | Simulated | 1000           | 0.37667    | 0.0655120 | 5.75    | <.0001* | 0.175948  | 0.57739   |
| Simulated | 100           | Simulated | 1000           | 0.11167    | 0.0655120 | 1.70    | 0.5407  | -0.089052 | 0.31239   |

Figure S3. The significance of the differences in percent change of TNF- $\alpha$  from the LPS-only control among GMP and GMPD at each concentration were assessed using multi-factor ANOVA followed by Tukey's HSD tests, using JMP software (version 17). n = 6 technical replicates (3 days of cell experiment replication, duplicate wells on each day).

| Digested  | Concentration | -Digested | -Concentration | Difference | Std Error | t Ratio | Prob> t | Lower 95% | Upper 95% |
|-----------|---------------|-----------|----------------|------------|-----------|---------|---------|-----------|-----------|
| No        | 10            | No        | 100            | -0.48167   | 0.0657943 | -7.32   | <.0001* | -0.68325  | -0.28008  |
| No        | 10            | No        | 1000           | -0.73167   | 0.0657943 | -11.12  | <.0001* | -0.93325  | -0.53008  |
| No        | 10            | Simulated | 10             | 0.41000    | 0.0657943 | 6.23    | <.0001* | 0.20842   | 0.61158   |
| No        | 10            | Simulated | 100            | 0.80667    | 0.0657943 | 12.26   | <.0001* | 0.60508   | 1.00825   |
| No        | 10            | Simulated | 1000           | 0.65667    | 0.0657943 | 9.98    | <.0001* | 0.45508   | 0.85825   |
| No        | 100           | No        | 1000           | -0.25000   | 0.0657943 | -3.80   | 0.0088* | -0.45158  | -0.04842  |
| No        | 100           | Simulated | 10             | 0.89167    | 0.0657943 | 13.55   | <.0001* | 0.69008   | 1.09325   |
| No        | 100           | Simulated | 100            | 1.28833    | 0.0657943 | 19.58   | <.0001* | 1.08675   | 1.48992   |
| No        | 100           | Simulated | 1000           | 1.13833    | 0.0657943 | 17.30   | <.0001* | 0.93675   | 1.33992   |
| No        | 1000          | Simulated | 10             | 1.14167    | 0.0657943 | 17.35   | <.0001* | 0.94008   | 1.34325   |
| No        | 1000          | Simulated | 100            | 1.53833    | 0.0657943 | 23.38   | <.0001* | 1.33675   | 1.73992   |
| No        | 1000          | Simulated | 1000           | 1.38833    | 0.0657943 | 21.10   | <.0001* | 1.18675   | 1.58992   |
| Simulated | 10            | Simulated | 100            | 0.39667    | 0.0657943 | 6.03    | <.0001* | 0.19508   | 0.59825   |
| Simulated | 10            | Simulated | 1000           | 0.24667    | 0.0657943 | 3.75    | 0.0100* | 0.04508   | 0.44825   |
| Simulated | 100           | Simulated | 1000           | -0.15000   | 0.0657943 | -2.28   | 0.2367  | -0.35158  | 0.05158   |

Figure S4. The significance of the differences in percent change of IL-1 $\beta$  from the LPS-only control among GMP and GMPD at each concentration were assessed using multi-factor ANOVA followed by Tukey's HSD tests, using JMP software (version 17). n = 6 technical replicates (3 days of cell experiment replication, duplicate wells on each day).
